# Supplementary material for: 8-Hydroxydaidzein Induces Apoptosis and Inhibits AML-Associated Gene Expression in U-937 Cells: Potential Phytochemical for AML Treatment
Source: MDPI journal article supplement (doi:10.3390/biom13111575), 2023-10-26
Supplement: s1 [file biomolecules-2630681-original-images.pdf › biomolecules-2630681-original-images.pdf]

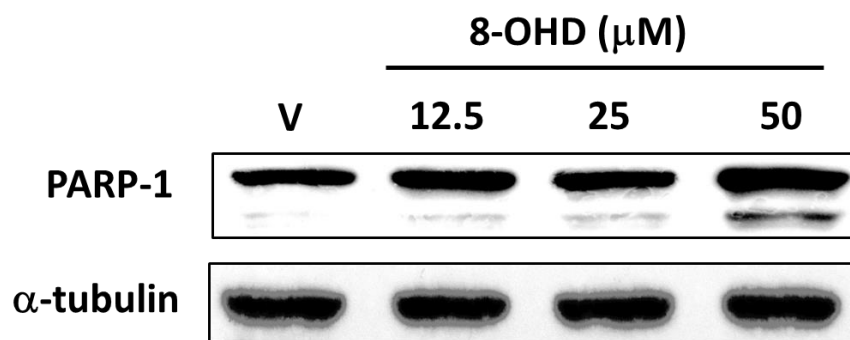

Fig3a.

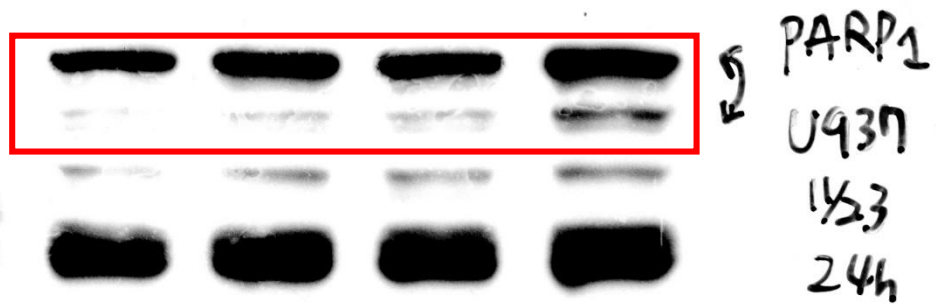

PARA-1

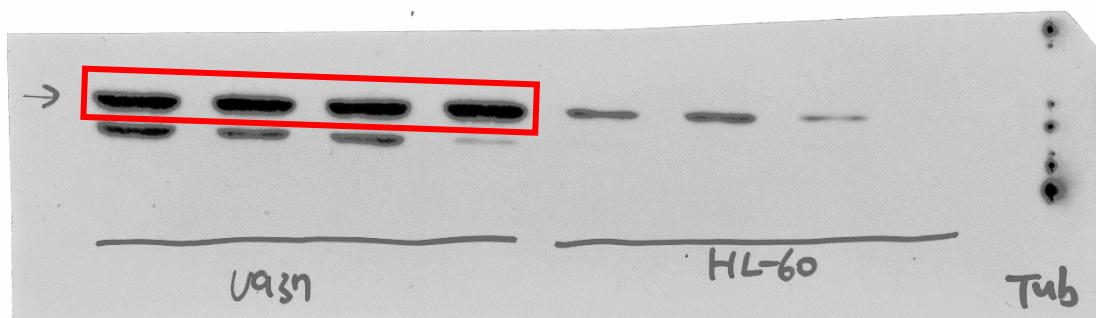

Tubulin

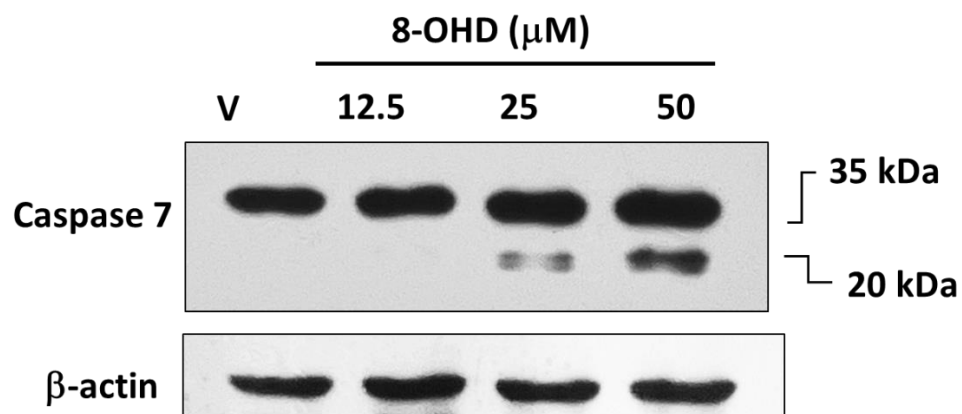

**Fig 3b**

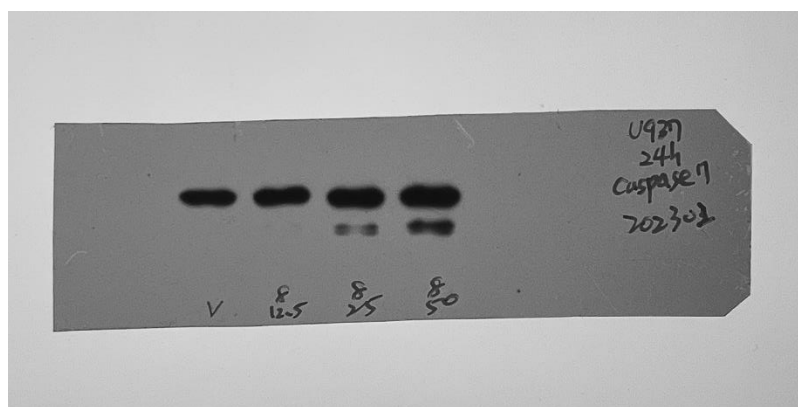

**Caspase 7**

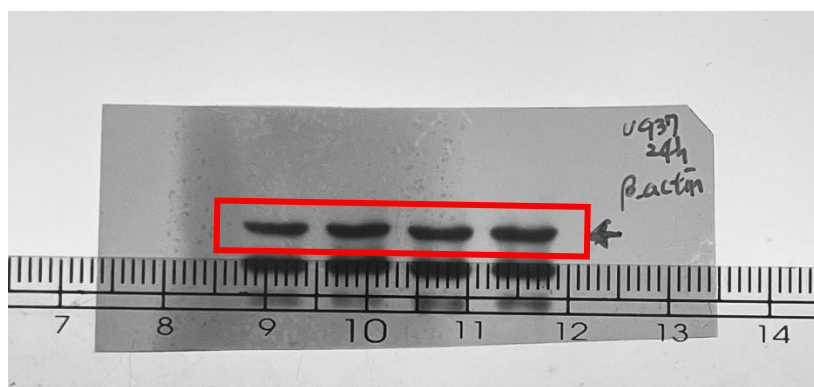

**$\beta$ -actin**

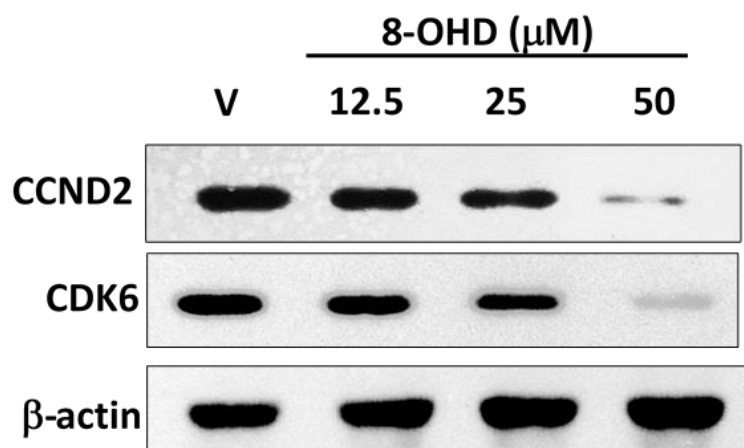

(c)

Fig. 5c

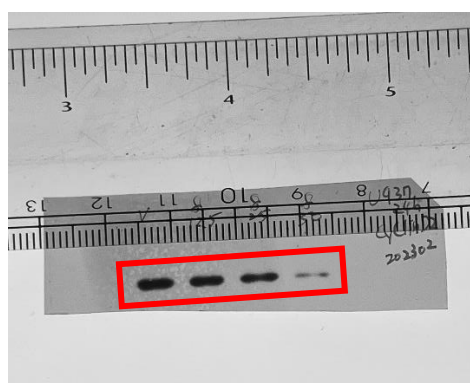

CCND2

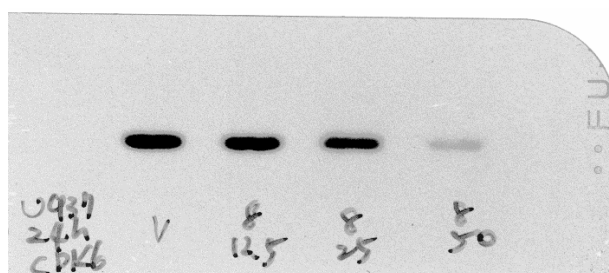

CDK6

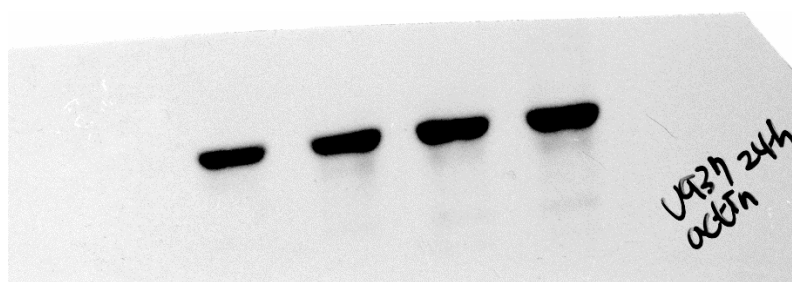

$\beta$ -actin

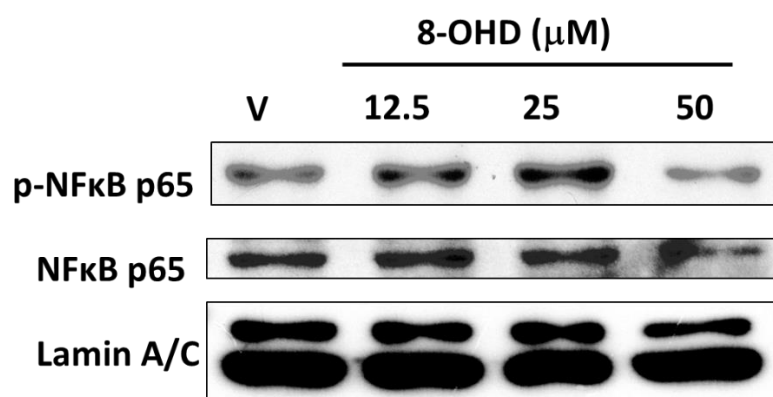

Fig 6c

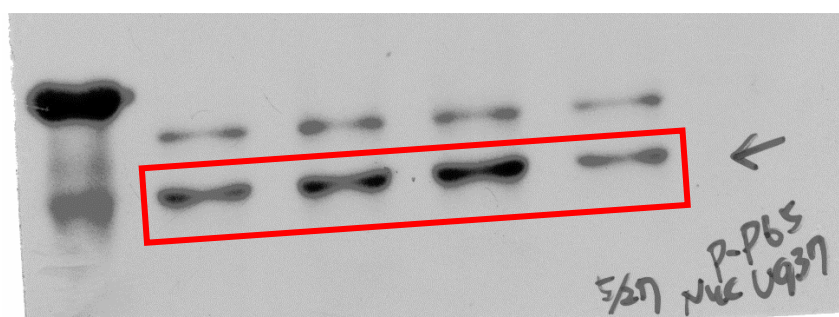

p-NFkB p65

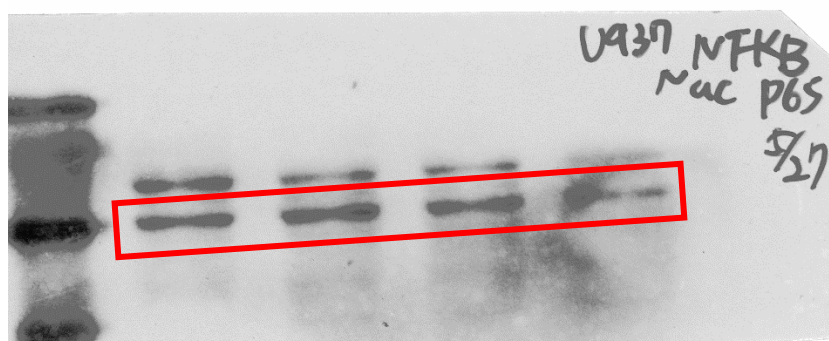

NFkB p65

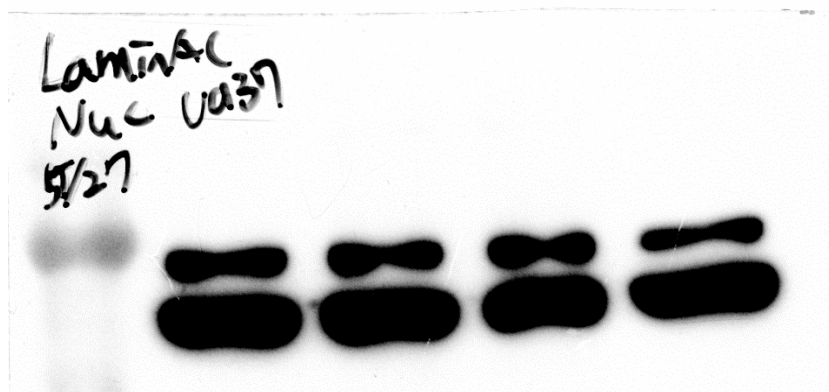

Lamin A/C

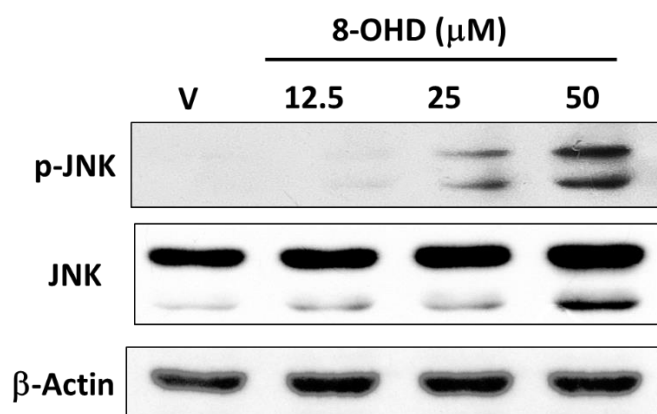

Fig 6f

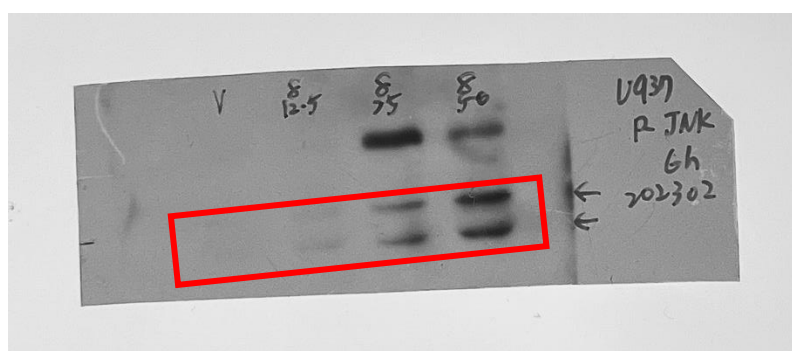

p-JNK

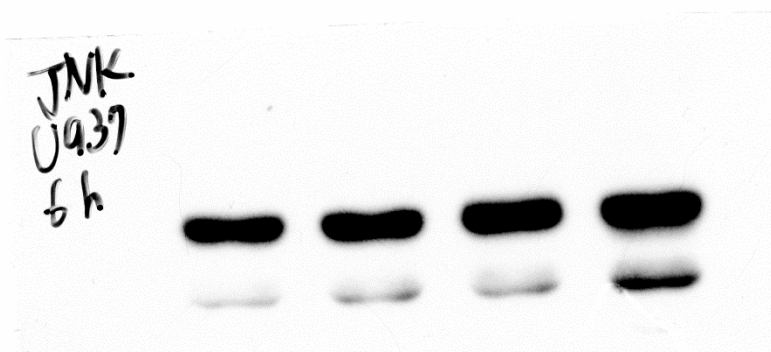

JNK

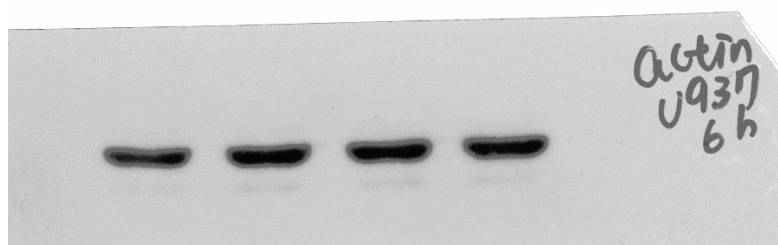

$\beta$ -actin
