# Supplementary material for: 8-Hydroxydaidzein Induces Apoptosis and Inhibits AML-Associated Gene Expression in U-937 Cells: Potential Phytochemical for AML Treatment
Source: MDPI journal article supplement (doi:10.3390/biom13111575), 2023-10-26
Supplement: s1 [file biomolecules-2630681-supplementary.pdf › biomolecules-2630681-supplementary.pdf]

## Supplemental Materials

Table S1. Enriched GO terms with 8-OHD-downregulated DEGs (adjusted  $p < 0.05$ ).

| c1 | Ontology Type | Ontology Name(Ontology-ID)                                       | Number Changed | Number Measured | Number in Ontology | Percent Changed | Z Score | Fisher Exact P | Adjusted P |
|----|---------------|------------------------------------------------------------------|----------------|-----------------|--------------------|-----------------|---------|----------------|------------|
| c1 | BP            | rRNA processing(GO:0006364)                                      | 32             | 120             | 120                | 26.7            | 15.27   | 8.82E-22       | 3.46E-18   |
| c1 | CC            | nucleolus(GO:0005730)                                            | 75             | 697             | 697                | 10.8            | 12.25   | 3.45E-22       | 1.81E-18   |
| c1 | BP            | ribosome biogenesis(GO:0042254)                                  | 15             | 52              | 52                 | 28.8            | 10.96   | 1.85E-11       | 3.24E-08   |
| c1 | BP            | pseudouridine synthesis(GO:0001522)                              | 9              | 20              | 20                 | 45.0            | 11.04   | 2.25E-09       | 1.86E-06   |
| c1 | CC            | mitochondrion(GO:0005739)                                        | 86             | 1512            | 1512               | 5.7             | 6.40    | 6.63E-09       | 4.96E-06   |
| c1 | MF            | pseudouridine synthase activity(GO:0009982)                      | 7              | 16              | 16                 | 43.8            | 9.58    | 1.87E-07       | 9.78E-05   |
| c1 | CC            | small nucleolar ribonucleoprotein complex(GO:0005732)            | 6              | 14              | 14                 | 42.9            | 8.76    | 1.70E-06       | 7.05E-04   |
| c1 | CC            | DNA-directed RNA polymerase I complex(GO:0005736)                | 4              | 5               | 5                  | 80.0            | 10.11   | 3.86E-06       | 1.48E-03   |
| c1 | CC            | mitochondrial part(GO:0044429)                                   | 49             | 835             | 835                | 5.9             | 4.99    | 9.45E-06       | 3.37E-03   |
| c1 | BP            | tRNA modification(GO:0006400)                                    | 7              | 28              | 28                 | 25.0            | 6.84    | 1.41E-05       | 4.88E-03   |
| c1 | BP            | translational elongation(GO:0006414)                             | 14             | 120             | 120                | 11.7            | 5.60    | 1.43E-05       | 4.88E-03   |
| c1 | BP            | translation(GO:0006412)                                          | 24             | 310             | 310                | 7.7             | 4.95    | 2.26E-05       | 7.40E-03   |
| c1 | CC            | ribosome(GO:0005840)                                             | 20             | 233             | 233                | 8.6             | 5.04    | 2.51E-05       | 8.05E-03   |
| c1 | CC            | preribosome, small subunit precursor(GO:0030688)                 | 3              | 3               | 3                  | 100.0           | 9.87    | 2.66E-05       | 8.20E-03   |
| c1 | MF            | transferase activity, transferring one-carbon groups(GO:0016741) | 19             | 215             | 215                | 8.8             | 5.06    | 2.66E-05       | 8.20E-03   |
| c1 | BP            | sulfur compound biosynthetic process(GO:0044272)                 | 13             | 114             | 114                | 11.4            | 5.29    | 3.66E-05       | 1.09E-02   |
| c1 | MF            | DNA-directed RNA polymerase activity(GO:0003899)                 | 9              | 56              | 56                 | 16.1            | 5.76    | 3.89E-05       | 1.11E-02   |
| c1 | BP            | viral transcription(GO:0019083)                                  | 12             | 103             | 103                | 11.7            | 5.17    | 5.87E-05       | 1.59E-02   |
| c1 | BP            | gene expression(GO:0010467)                                      | 44             | 778             | 778                | 5.7             | 4.45    | 5.67E-05       | 1.59E-02   |
| c1 | MF            | structural constituent of ribosome(GO:0003735)                   | 17             | 193             | 193                | 8.8             | 4.77    | 7.26E-05       | 1.87E-02   |
| c1 | MF            | snoRNA binding(GO:0030515)                                       | 5              | 16              | 16                 | 31.3            | 6.64    | 7.80E-05       | 1.95E-02   |
| c1 | CC            | PeBoW complex(GO:0070545)                                        | 3              | 4               | 4                  | 75.0            | 8.46    | 1.04E-04       | 2.35E-02   |
| c1 | BP            | RNA catabolic process(GO:0006401)                                | 20             | 258             | 258                | 7.8             | 4.52    | 1.05E-04       | 2.35E-02   |

Table S2. Enriched GO terms with 8-OHD-upregulated DEGs (adjusted  $p < 0.05$ ).

| c2 | Ontology Type | Ontology Name(Ontology-ID)                                                            | Number Changed | Number Measured | Number in Ontology | Percent Changed | Z Score | Fisher Exact P | Adjusted P |
|----|---------------|---------------------------------------------------------------------------------------|----------------|-----------------|--------------------|-----------------|---------|----------------|------------|
| c2 | BP            | response to biotic stimulus(GO:0009607)                                               | 75             | 821             | 821                | 9.1             | 11.91   | 2.32E-21       | 3.65E-17   |
| c2 | BP            | immune response(GO:0006955)                                                           | 81             | 1216            | 1216               | 6.7             | 9.08    | 1.12E-14       | 2.20E-11   |
| c2 | BP            | inflammatory response(GO:0006954)                                                     | 41             | 418             | 418                | 9.8             | 9.28    | 4.29E-13       | 5.19E-10   |
| c2 | BP            | positive regulation of defense response(GO:0031349)                                   | 31             | 248             | 248                | 12.5            | 9.79    | 6.15E-13       | 6.90E-10   |
| c2 | BP            | leukocyte activation(GO:0045321)                                                      | 36             | 369             | 369                | 9.8             | 8.65    | 1.41E-11       | 1.11E-08   |
| c2 | BP            | regulation of apoptosis(GO:0042981)                                                   | 75             | 1342            | 1342               | 5.6             | 7.02    | 4.87E-10       | 2.32E-07   |
| c2 | BP            | leukocyte migration(GO:0050900)                                                       | 24             | 227             | 227                | 10.6            | 7.53    | 7.79E-09       | 2.48E-06   |
| c2 | BP            | positive regulation of programmed cell death(GO:0043068)                              | 41             | 575             | 575                | 7.1             | 6.86    | 7.90E-09       | 2.48E-06   |
| c2 | BP            | negative regulation of molecular function(GO:0044092)                                 | 49             | 789             | 789                | 6.2             | 6.42    | 3.54E-08       | 9.11E-06   |
| c2 | BP            | regulation of sequence-specific DNA binding transcription factor activity(GO:0051090) | 29             | 365             | 365                | 7.9             | 6.42    | 1.36E-07       | 3.01E-05   |
| c2 | BP            | cellular response to stress(GO:0033554)                                               | 62             | 1174            | 1174               | 5.3             | 5.86    | 1.49E-07       | 3.25E-05   |
| c2 | CC            | cytosol(GO:0005829)                                                                   | 113            | 2666            | 2666               | 4.2             | 5.58    | 1.71E-07       | 3.63E-05   |
| c2 | BP            | regulation of protein kinase activity(GO:0045859)                                     | 43             | 708             | 708                | 6.1             | 5.84    | 4.24E-07       | 8.21E-05   |
| c2 | BP            | response to mechanical stimulus(GO:0009612)                                           | 17             | 150             | 150                | 11.3            | 6.70    | 4.45E-07       | 8.43E-05   |
| c2 | BP            | negative regulation of response to stimulus(GO:0048585)                               | 45             | 770             | 770                | 5.8             | 5.70    | 7.21E-07       | 1.33E-04   |
| c2 | BP            | regulation of signal transduction(GO:0009966)                                         | 81             | 1791            | 1791               | 4.5             | 5.26    | 1.29E-06       | 2.30E-04   |
| c2 | BP            | negative regulation of viral genome replication(GO:0045071)                           | 9              | 43              | 43                 | 20.9            | 7.52    | 1.41E-06       | 2.42E-04   |
| c2 | BP            | cell cycle arrest(GO:0007050)                                                         | 15             | 143             | 143                | 10.5            | 5.90    | 5.55E-06       | 7.39E-04   |
| c2 | BP            | positive regulation of cytokine production(GO:0001819)                                | 20             | 240             | 240                | 8.3             | 5.57    | 5.89E-06       | 7.71E-04   |
| c2 | BP            | regulation of biological quality(GO:0065008)                                          | 99             | 2417            | 2417               | 4.1             | 4.81    | 6.87E-06       | 8.85E-04   |
| c2 | BP            | response to organic cyclic compound(GO:0014070)                                       | 19             | 224             | 224                | 8.5             | 5.51    | 7.78E-06       | 9.86E-04   |
| c2 | BP            | negative regulation of immune system process(GO:0002683)                              | 19             | 225             | 225                | 8.4             | 5.49    | 8.29E-06       | 1.04E-03   |
| c2 | BP            | positive regulation of metabolic process(GO:0009893)                                  | 85             | 2005            | 2005               | 4.2             | 4.76    | 8.95E-06       | 1.12E-03   |

|    |    |                                                                         |     |      |      |       |       |          |          |
|----|----|-------------------------------------------------------------------------|-----|------|------|-------|-------|----------|----------|
| c2 | BP | regulation of transcription from RNA polymerase II promoter(GO:0006357) | 64  | 1393 | 1393 | 4.6   | 4.76  | 1.18E-05 | 1.45E-03 |
| c2 | BP | developmental maturation(GO:0021700)                                    | 14  | 137  | 137  | 10.2  | 5.58  | 1.53E-05 | 1.85E-03 |
| c2 | MF | chemokine activity(GO:0008009)                                          | 9   | 57   | 57   | 15.8  | 6.23  | 1.62E-05 | 1.91E-03 |
| c2 | MF | cyclin-dependent protein kinase regulator activity(GO:0016538)          | 6   | 22   | 22   | 27.3  | 7.24  | 1.66E-05 | 1.94E-03 |
| c2 | MF | 2'-5'-oligoadenylate synthetase activity(GO:0001730)                    | 3   | 3    | 3    | 100.0 | 10.55 | 1.80E-05 | 2.09E-03 |
| c2 | BP | response to metal ion(GO:0010038)                                       | 19  | 239  | 239  | 7.9   | 5.18  | 1.95E-05 | 2.22E-03 |
| c2 | MF | DNA binding(GO:0003677)                                                 | 103 | 2633 | 2633 | 3.9   | 4.42  | 2.74E-05 | 2.99E-03 |
| c2 | BP | transforming growth factor beta receptor signaling pathway(GO:0007179)  | 13  | 126  | 126  | 10.3  | 5.42  | 2.77E-05 | 3.00E-03 |
| c2 | BP | cellular response to external stimulus(GO:0071496)                      | 17  | 207  | 207  | 8.2   | 5.05  | 3.51E-05 | 3.58E-03 |
| c2 | CC | nucleus(GO:0005634)                                                     | 193 | 5712 | 5712 | 3.4   | 4.19  | 4.30E-05 | 4.31E-03 |
| c2 | BP | negative regulation of signaling(GO:0023057)                            | 35  | 640  | 640  | 5.5   | 4.57  | 4.38E-05 | 4.33E-03 |
| c2 | BP | positive regulation of prostaglandin secretion(GO:0032308)              | 4   | 9    | 9    | 44.4  | 7.85  | 5.32E-05 | 5.10E-03 |
| c2 | BP | regulation of heat generation(GO:0031650)                               | 5   | 17   | 17   | 29.4  | 6.91  | 5.82E-05 | 5.38E-03 |
| c2 | BP | negative regulation of plasminogen activation(GO:0010757)               | 3   | 4    | 4    | 75.0  | 9.06  | 7.05E-05 | 6.44E-03 |
| c2 | BP | plasma membrane organization(GO:0007009)                                | 9   | 69   | 69   | 13.0  | 5.42  | 7.72E-05 | 6.94E-03 |
| c2 | BP | response to temperature stimulus(GO:0009266)                            | 12  | 123  | 123  | 9.8   | 4.96  | 9.67E-05 | 8.26E-03 |
| c2 | BP | regulation of adaptive immune response(GO:0002819)                      | 12  | 125  | 125  | 9.6   | 4.89  | 1.13E-04 | 9.35E-03 |
| c2 | BP | regulation of angiogenesis(GO:0045765)                                  | 14  | 166  | 166  | 8.4   | 4.70  | 1.28E-04 | 1.03E-02 |
| c2 | BP | negative regulation of cell communication(GO:0010648)                   | 34  | 643  | 643  | 5.3   | 4.29  | 1.27E-04 | 1.03E-02 |
| c2 | BP | lymphocyte mediated immunity(GO:0002449)                                | 9   | 74   | 74   | 12.2  | 5.14  | 1.34E-04 | 1.07E-02 |
| c2 | CC | cytoplasm(GO:0005737)                                                   | 172 | 5082 | 5082 | 3.4   | 3.90  | 1.48E-04 | 1.17E-02 |
| c2 | BP | regulation of NF-kappaB import into nucleus(GO:0042345)                 | 7   | 45   | 45   | 15.6  | 5.43  | 1.58E-04 | 1.22E-02 |
| c2 | CC | I-kappaB/NF-kappaB complex(GO:0033256)                                  | 3   | 5    | 5    | 60.0  | 8.03  | 1.73E-04 | 1.31E-02 |
| c2 | BP | regulation of defense response to virus by host(GO:0050691)             | 6   | 33   | 33   | 18.2  | 5.60  | 1.92E-04 | 1.43E-02 |

|    |    |                                                                               |    |      |      |      |      |          |          |
|----|----|-------------------------------------------------------------------------------|----|------|------|------|------|----------|----------|
| c2 | BP | regulation of interleukin-6 production(GO:0032675)                            | 9  | 78   | 78   | 11.5 | 4.93 | 2.02E-04 | 1.47E-02 |
| c2 | BP | regulation of type I interferon production(GO:0032479)                        | 9  | 78   | 78   | 11.5 | 4.93 | 2.02E-04 | 1.47E-02 |
| c2 | MF | double-stranded RNA binding(GO:0003725)                                       | 7  | 47   | 47   | 14.9 | 5.27 | 2.09E-04 | 1.52E-02 |
| c2 | BP | negative regulation of developmental process(GO:0051093)                      | 32 | 607  | 607  | 5.3  | 4.14 | 2.33E-04 | 1.64E-02 |
| c2 | BP | hemopoietic or lymphoid organ development(GO:0048534)                         | 15 | 198  | 198  | 7.6  | 4.38 | 2.43E-04 | 1.69E-02 |
| c2 | BP | integrin-mediated signaling pathway(GO:0007229)                               | 9  | 80   | 80   | 11.3 | 4.84 | 2.45E-04 | 1.69E-02 |
| c2 | BP | response to interferon-beta(GO:0035456)                                       | 4  | 13   | 13   | 30.8 | 6.35 | 2.78E-04 | 1.87E-02 |
| c2 | BP | regulation of vascular endothelial growth factor production(GO:0010574)       | 5  | 23   | 23   | 21.7 | 5.74 | 2.78E-04 | 1.87E-02 |
| c2 | MF | sequence-specific DNA binding transcription factor activity(GO:0003700)       | 49 | 1105 | 1105 | 4.4  | 3.87 | 3.17E-04 | 2.03E-02 |
| c2 | BP | regulation of cytokine secretion(GO:0050707)                                  | 10 | 102  | 102  | 9.8  | 4.55 | 3.50E-04 | 2.17E-02 |
| c2 | BP | negative regulation of RNA metabolic process(GO:0051253)                      | 44 | 955  | 955  | 4.6  | 3.93 | 3.65E-04 | 2.25E-02 |
| c2 | MF | natural killer cell lectin-like receptor binding(GO:0046703)                  | 4  | 14   | 14   | 28.6 | 6.08 | 3.81E-04 | 2.30E-02 |
| c2 | BP | regulation of wound healing(GO:0061041)                                       | 9  | 85   | 85   | 10.6 | 4.60 | 3.87E-04 | 2.32E-02 |
| c2 | BP | positive regulation of smooth muscle cell proliferation(GO:0048661)           | 7  | 54   | 54   | 13.0 | 4.76 | 5.02E-04 | 2.83E-02 |
| c2 | BP | regulation of natural killer cell chemotaxis(GO:2000501)                      | 3  | 7    | 7    | 42.9 | 6.66 | 5.81E-04 | 3.18E-02 |
| c2 | BP | negative regulation of tumor necrosis factor biosynthetic process(GO:0042536) | 3  | 7    | 7    | 42.9 | 6.66 | 5.81E-04 | 3.18E-02 |
| c2 | MF | calmodulin binding(GO:0005516)                                                | 13 | 172  | 172  | 7.6  | 4.06 | 6.34E-04 | 3.34E-02 |
| c2 | BP | regulation of phagocytosis(GO:0050764)                                        | 6  | 41   | 41   | 14.6 | 4.82 | 6.54E-04 | 3.42E-02 |
| c2 | BP | response to vitamin D(GO:0033280)                                             | 4  | 16   | 16   | 25.0 | 5.60 | 6.64E-04 | 3.44E-02 |
| c2 | CC | external side of plasma membrane(GO:0009897)                                  | 14 | 196  | 196  | 7.1  | 3.98 | 6.99E-04 | 3.54E-02 |
| c2 | BP | positive regulation of signaling(GO:0023056)                                  | 38 | 817  | 817  | 4.7  | 3.70 | 7.04E-04 | 3.54E-02 |
| c2 | BP | positive regulation of cell communication(GO:0010647)                         | 38 | 817  | 817  | 4.7  | 3.70 | 7.04E-04 | 3.54E-02 |

|    |    |                                                         |    |     |     |      |      |          |          |
|----|----|---------------------------------------------------------|----|-----|-----|------|------|----------|----------|
| c2 | BP | negative regulation of homeostatic process(GO:0032845)  | 5  | 28  | 28  | 17.9 | 5.05 | 7.28E-04 | 3.59E-02 |
| c2 | BP | response to gamma radiation(GO:0010332)                 | 6  | 42  | 42  | 14.3 | 4.73 | 7.47E-04 | 3.64E-02 |
| c2 | BP | positive regulation of leukocyte chemotaxis(GO:0002690) | 7  | 58  | 58  | 12.1 | 4.51 | 7.78E-04 | 3.75E-02 |
| c2 | BP | monocyte differentiation(GO:0030224)                    | 4  | 17  | 17  | 23.5 | 5.39 | 8.50E-04 | 4.01E-02 |
| c2 | BP | cytolysis(GO:0019835)                                   | 5  | 29  | 29  | 17.2 | 4.93 | 8.61E-04 | 4.03E-02 |
| c2 | CC | extracellular space(GO:0005615)                         | 41 | 906 | 906 | 4.5  | 3.66 | 8.69E-04 | 4.04E-02 |
| c2 | BP | cellular response to interferon-alpha(GO:0035457)       | 3  | 8   | 8   | 37.5 | 6.17 | 9.12E-04 | 4.13E-02 |
| c2 | BP | regulation of endopeptidase activity(GO:0052548)        | 17 | 272 | 272 | 6.3  | 3.77 | 9.02E-04 | 4.13E-02 |
| c2 | BP | regulation of interleukin-1 beta production(GO:0032651) | 6  | 44  | 44  | 13.6 | 4.57 | 9.61E-04 | 4.27E-02 |
| c2 | BP | negative regulation of cell proliferation(GO:0008285)   | 30 | 612 | 612 | 4.9  | 3.58 | 1.13E-03 | 4.82E-02 |
| c2 | BP | response to dsRNA(GO:0043331)                           | 5  | 31  | 31  | 16.1 | 4.71 | 1.18E-03 | 4.97E-02 |
| c2 | BP | MAPKKK cascade(GO:0000165)                              | 13 | 184 | 184 | 7.1  | 3.79 | 1.18E-03 | 4.97E-02 |

Table S3. 8-OHD Target Protein Prediction

| Target                                                 | Common name | Target Class                              | Probability* | Known actives<br>(3D/2D) |
|--------------------------------------------------------|-------------|-------------------------------------------|--------------|--------------------------|
| Xanthine dehydrogenase                                 | XDH         | Oxidoreductase                            | 1.00         | 12 / 20                  |
| 6-phosphofructo-2-kinase/fructose-2,6-bisphosphatase 3 | PFKFB3      | Enzyme                                    | 1.00         | 2 / 2                    |
| Arachidonate 12-lipoxygenase                           | ALOX12      | Enzyme                                    | 0.90         | 9 / 11                   |
| Estrogen receptor alpha                                | ESR1        | Nuclear receptor                          | 0.37         | 78 / 71                  |
| Estrogen receptor beta                                 | ESR2        | Nuclear receptor                          | 0.37         | 98 / 59                  |
| Arachidonate 15-lipoxygenase                           | ALOX15      | Enzyme                                    | 0.35         | 6 / 8                    |
| Monoamine oxidase A                                    | MAOA        | Oxidoreductase                            | 0.31         | 6 / 28                   |
| Adenosine A1 receptor<br>(by homology)                 | ADORA1      | Family A G<br>protein-coupled<br>receptor | 0.31         | 6 / 16                   |
| Adenosine A2a receptor                                 | ADORA2A     | Family A G<br>protein-coupled<br>receptor | 0.31         | 5 / 13                   |
| Estradiol 17-beta-dehydrogenase 1                      | HSD17B1     | Enzyme                                    | 0.31         | 9 / 5                    |
| ATP-binding cassette sub-family G member 2             | ABCG2       | Primary active<br>transporter             | 0.31         | 6 / 34                   |
| Thromboxane-A synthase                                 | TBXAS1      | Cytochrome P450                           | 0.29         | 1 / 1                    |
| Epidermal growth factor<br>receptor erbB1              | EGFR        | Kinase                                    | 0.29         | 9 / 8                    |
| Maltase-glucoamylase                                   | MGAM        | Hydrolase                                 | 0.29         | 1 / 1                    |
| Serotonin 2a (5-HT2a)<br>receptor                      | HTR2A       | Family A G<br>protein-coupled<br>receptor | 0.29         | 1 / 1                    |
| Serotonin 2c (5-HT2c)<br>receptor                      | HTR2C       | Family A G<br>protein-coupled<br>receptor | 0.29         | 1 / 2                    |
| Estrogen-related receptor<br>alpha                     | ESRRA       | Nuclear receptor                          | 0.29         | 2 / 2                    |

|                                                  |         |                                           |      |         |
|--------------------------------------------------|---------|-------------------------------------------|------|---------|
| Estrogen-related receptor<br>beta                | ESRRB   | Nuclear receptor                          | 0.29 | 1 / 1   |
| Carbonic anhydrase VII                           | CA7     | Lyase                                     | 0.25 | 8 / 13  |
| Carbonic anhydrase XII                           | CA12    | Lyase                                     | 0.25 | 10 / 17 |
| Carbonic anhydrase IV                            | CA4     | Lyase                                     | 0.22 | 7 / 10  |
| Tyrosinase (by<br>homology)                      | TYR     | Oxidoreductase                            | 0.21 | 2 / 2   |
| Macrophage migration<br>inhibitory factor        | MIF     | Enzyme                                    | 0.21 | 1 / 7   |
| Aldehyde dehydrogenase                           | ALDH2   | Oxidoreductase                            | 0.18 | 1 / 45  |
| Cytochrome P450 19A1                             | CYP19A1 | Cytochrome P450                           | 0.17 | 6 / 24  |
| Receptor-type tyrosine-<br>protein phosphatase S | PTPRS   | Phosphatase                               | 0.15 | 7 / 7   |
| Estradiol 17-beta-<br>dehydrogenase 2            | HSD17B2 | Enzyme                                    | 0.15 | 9 / 4   |
| NADPH oxidase 4                                  | NOX4    | Enzyme                                    | 0.13 | 6 / 7   |
| P-glycoprotein 1                                 | ABCB1   | Primary active<br>transporter             | 0.12 | 12 / 41 |
| Interleukin-2                                    | IL2     | Secreted protein                          | 0.12 | 0 / 4   |
| Carbonyl reductase<br>[NADPH] 1                  | CBR1    | Enzyme                                    | 0.11 | 3 / 2   |
| Acetylcholinesterase                             | ACHE    | Hydrolase                                 | 0.10 | 4 / 32  |
| Cyclooxygenase-1                                 | PTGS1   | Oxidoreductase                            | 0.10 | 0 / 3   |
| Norepinephrine<br>transporter                    | SLC6A2  | Electrochemical<br>transporter            | 0.10 | 0 / 1   |
| Serum<br>paraoxonase/arylesterase<br>1           | PON1    | Enzyme                                    | 0.10 | 0 / 1   |
| Carbonic anhydrase II                            | CA2     | Lyase                                     | 0.10 | 8 / 22  |
| Monoamine oxidase B                              | MAOB    | Oxidoreductase                            | 0.10 | 0 / 77  |
| Alpha-synuclein                                  | SNCA    | Unclassified<br>protein                   | 0.10 | 2 / 0   |
| Telomerase reverse<br>transcriptase              | TERT    | Enzyme                                    | 0.10 | 9 / 10  |
| Corticotropin releasing<br>factor receptor 1     | CRHR1   | Family B G<br>protein-coupled<br>receptor | 0.10 | 1 / 0   |

|                                                             |                           |                              |      |         |
|-------------------------------------------------------------|---------------------------|------------------------------|------|---------|
| Insulin-like growth factor binding protein 3                | IGFBP3                    | Secreted protein             | 0.10 | 3 / 0   |
| Cyclooxygenase-2                                            | PTGS2                     | Oxidoreductase               | 0.10 | 2 / 7   |
| Steryl-sulfatase                                            | STS                       | Enzyme                       | 0.10 | 0 / 6   |
| Toll-like receptor (TLR7/TLR9)                              | TLR9                      | Toll-like and Il-1 receptors | 0.10 | 0 / 1   |
| Carbonic anhydrase I                                        | CA1                       | Lyase                        | 0.10 | 4 / 21  |
| Cyclin-dependent kinase 5/CDK5 activator 1                  | CDK5R1 CDK5               | Kinase                       | 0.10 | 6 / 6   |
| Arachidonate 5-lipoxygenase                                 | ALOX5                     | Oxidoreductase               | 0.10 | 5 / 26  |
| Induced myeloid leukemia cell differentiation protein Mcl-1 | MCL1                      | Other cytosolic protein      | 0.10 | 5 / 4   |
| Aldose reductase (by homology)                              | AKR1B1                    | Enzyme                       | 0.10 | 17 / 51 |
| Tyrosine-protein kinase receptor FLT3                       | FLT3                      | Kinase                       | 0.10 | 6 / 6   |
| Multidrug resistance-associated protein 1                   | ABCC1                     | Primary active transporter   | 0.10 | 7 / 10  |
| Cytochrome P450 1B1                                         | CYP1B1                    | Cytochrome P450              | 0.10 | 12 / 22 |
| Cyclin-dependent kinase 1/cyclin B                          | CCNB3 CDK1<br>CCNB1 CCNB2 | Other cytosolic protein      | 0.10 | 4 / 4   |
| Cyclin-dependent kinase 6                                   | CDK6                      | Kinase                       | 0.10 | 3 / 3   |
| Tyrosine-protein kinase SYK                                 | SYK                       | Kinase                       | 0.10 | 3 / 3   |
| Glycogen synthase kinase-3 beta                             | GSK3B                     | Kinase                       | 0.10 | 3 / 7   |
| Transthyretin                                               | TTR                       | Secreted protein             | 0.10 | 2 / 2   |
| Casein kinase II alpha                                      | CSNK2A1                   | Kinase                       | 0.10 | 4 / 3   |
| Cystic fibrosis transmembrane conductance regulator         | CFTR                      | Other ion channel            | 0.10 | 1 / 1   |
| Aldo-keto reductase family 1 member B10                     | AKR1B10                   | Enzyme                       | 0.10 | 2 / 3   |
| Tankyrase-2                                                 | TNKS2                     | Enzyme                       | 0.10 | 4 / 7   |



|                                                 |           |                  |      |        |
|-------------------------------------------------|-----------|------------------|------|--------|
| Tankyrase-1                                     | TNKS      | Enzyme           | 0.10 | 4 / 10 |
| Protein<br>farnesyltransferase                  | FNTA FNTB | Enzyme           | 0.10 | 1 / 0  |
| Serine/threonine-protein<br>kinase PIM1         | PIM1      | Kinase           | 0.10 | 8 / 5  |
| Serine/threonine-protein<br>kinase Aurora-B     | AURKB     | Kinase           | 0.10 | 3 / 4  |
| Insulin-like growth factor<br>binding protein 6 | IGFBP6    | Secreted protein | 0.10 | 2 / 0  |
| Insulin-like growth factor<br>binding protein 4 | IGFBP4    | Secreted protein | 0.10 | 2 / 0  |
| Insulin-like growth factor<br>binding protein 5 | IGFBP5    | Secreted protein | 0.10 | 2 / 0  |
| Insulin-like growth factor<br>binding protein 2 | IGFBP2    | Secreted protein | 0.10 | 2 / 0  |
| Insulin-like growth factor<br>binding protein 1 | IGFBP1    | Secreted protein | 0.10 | 2 / 0  |
| Insulin-like growth factor<br>I receptor        | IGF1R     | Kinase           | 0.10 | 3 / 3  |

Table S4. 8-OHD affects Ara-C-metabolizing gene expression

| Gene<br>symbol | Description                 | log <sub>2</sub> FC | <i>P.</i> value |
|----------------|-----------------------------|---------------------|-----------------|
| <i>CDA</i>     | cytidine deaminase          | -0.680175           | 0.0027          |
| <i>DCK</i>     | deoxycytidine kinase        | 0.606318            | 0.0073          |
| <i>RRM2</i>    | ribonucleotide reductase M2 | 1.44291             | 0.0001          |

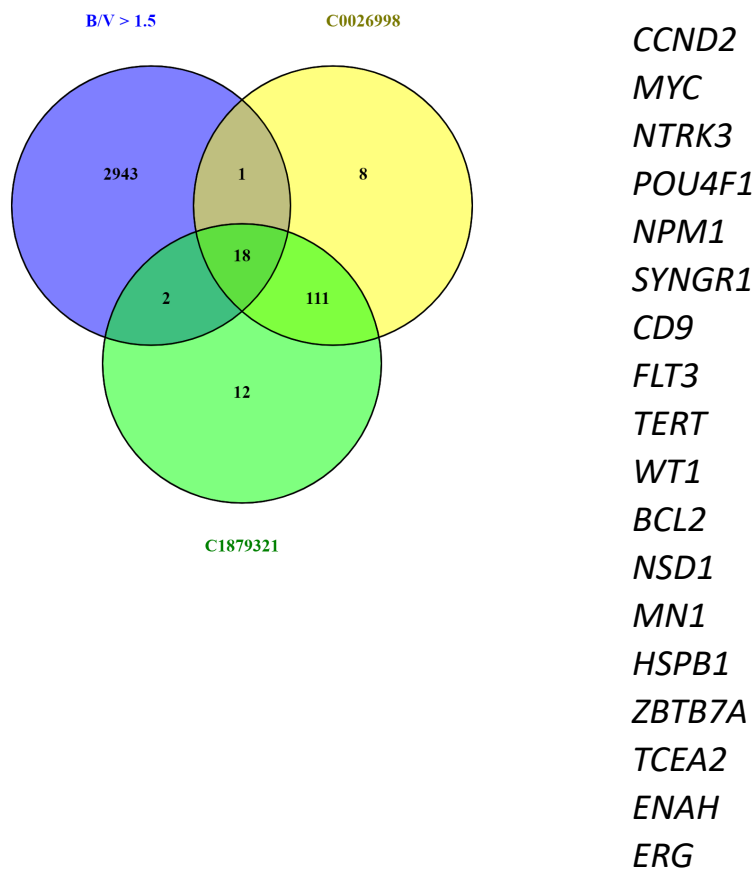

Figure S1. Venn diagram of 8-OHD-downregulated DEGs ( $B/V > 1.5$  and  $p < 0.05$ ) and gene sets of DisGeNET CUI: C0026998 and CUI: C1879321. The 18 genes in the intersection of three sets were listed at right side.

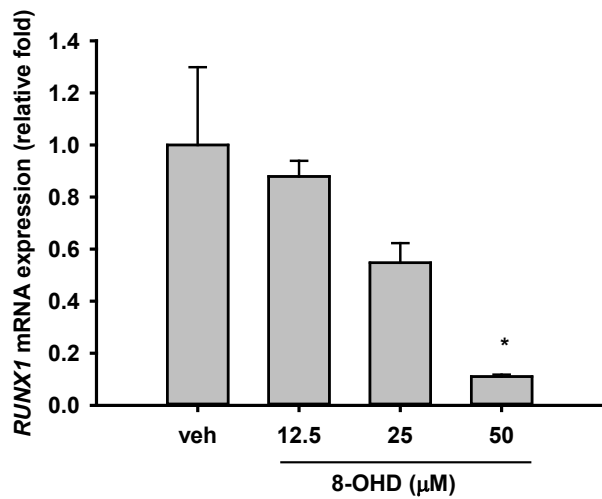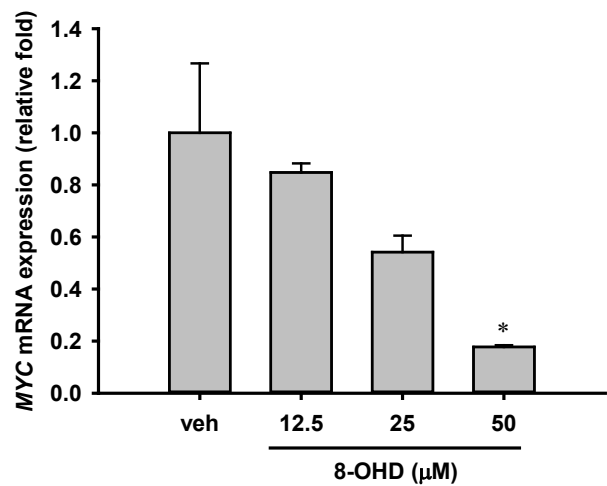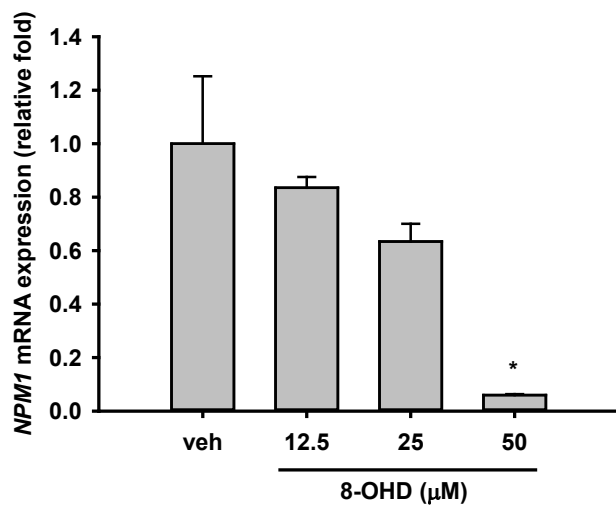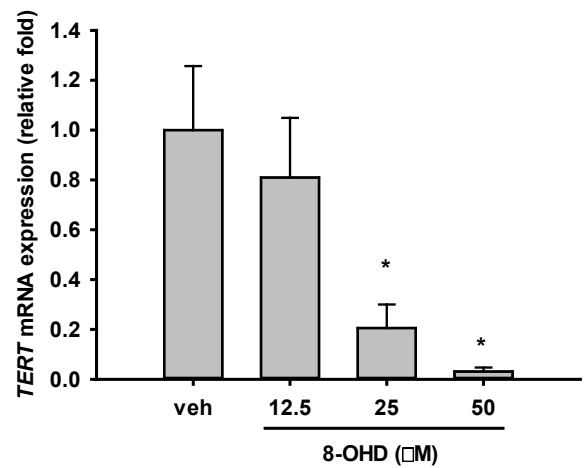

(c)

(d)

Figure S2. GSEA result indicates that the gene set “Hallmark Myc Targets v.1” is enriched with 8-OHD-downregulated DEGs. The barcode plot indicates the position of the genes in each gene set. The horizontal bar in graded color from red to blue indicates up- and down-regulated by 8-OHD. The vertical axis in the lower plot indicates Ranked List Metri

Known actives on Telomerase reverse transcriptase, similar in 3D

|                                                                                                                                                |                                                                                                                                              |                                                                                                                                               |                                                                                                                                                |
|------------------------------------------------------------------------------------------------------------------------------------------------|----------------------------------------------------------------------------------------------------------------------------------------------|-----------------------------------------------------------------------------------------------------------------------------------------------|------------------------------------------------------------------------------------------------------------------------------------------------|
| <p>CHEMBL420982<br/>Similarity: 0.950</p>  <p>👤 ⚡ 🔍 🧪 😊</p>   | <p>CHEMBL222541<br/>Similarity: 0.922</p>  <p>👤 ⚡ 🔍 🧪 😊</p> | <p>CHEMBL426182<br/>Similarity: 0.912</p>  <p>👤 ⚡ 🔍 🧪 😊</p> | <p>CHEMBL222354<br/>Similarity: 0.906</p>  <p>👤 ⚡ 🔍 🧪 😊</p> |
| <p>CHEMBL225211<br/>Similarity: 0.895</p>  <p>👤 ⚡ 🔍 🧪 😊</p>   | <p>CHEMBL222132<br/>Similarity: 0.876</p>  <p>👤 ⚡ 🔍 🧪 😊</p> | <p>CHEMBL390725<br/>Similarity: 0.856</p>  <p>👤 ⚡ 🔍 🧪 😊</p> | <p>CHEMBL222757<br/>Similarity: 0.849</p>  <p>👤 ⚡ 🔍 🧪 😊</p> |
| <p>CHEMBL222539<br/>Similarity: 0.798</p>  <p>👤 ⚡ 🔍 🧪 😊</p> |                                                                                                                                              |                                                                                                                                               |                                                                                                                                                |

(a)

### Known actives on Tyrosine-protein kinase receptor FLT3, similar in 3D

|                                                                                                                                               |                                                                                                                                                  |                                                                                                                                                |                                                                                                                                                |
|-----------------------------------------------------------------------------------------------------------------------------------------------|--------------------------------------------------------------------------------------------------------------------------------------------------|------------------------------------------------------------------------------------------------------------------------------------------------|------------------------------------------------------------------------------------------------------------------------------------------------|
| <p>CHEMBL28<br/>Similarity: 0.939</p> 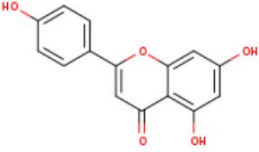 <p>🧑🏻‍🔬 ⬆️ 🧬 🧫 😊</p>  | <p>CHEMBL150<br/>Similarity: 0.903</p>  <p>🧑🏻‍🔬 ⬆️ 🧬 🧫 😊</p>    | <p>CHEMBL151<br/>Similarity: 0.891</p>  <p>🧑🏻‍🔬 ⬆️ 🧬 🧫 😊</p> | <p>CHEMBL50<br/>Similarity: 0.847</p>  <p>🧑🏻‍🔬 ⬆️ 🧬 🧫 😊</p> |
| <p>CHEMBL164<br/>Similarity: 0.791</p>  <p>🧑🏻‍🔬 ⬆️ 🧬 🧫 😊</p> | <p>CHEMBL183513<br/>Similarity: 0.763</p>  <p>🧑🏻‍🔬 ⬆️ 🧬 🧫 😊</p> |                                                                                                                                                |                                                                                                                                                |

(b)

### Known actives on Cyclin-dependent kinase 6, similar in 3D

|                                                                                                                                                |                                                                                                                                                   |                                                                                                                                                   |
|------------------------------------------------------------------------------------------------------------------------------------------------|---------------------------------------------------------------------------------------------------------------------------------------------------|---------------------------------------------------------------------------------------------------------------------------------------------------|
| <p>CHEMBL28<br/>Similarity: 0.939</p> 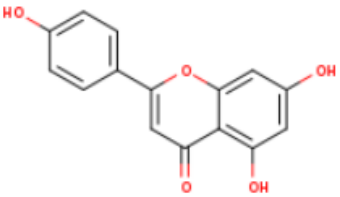 <p>🧑🏻‍🔬 ⬆️ 🧬 🧫 😊</p> | <p>CHEMBL31574<br/>Similarity: 0.893</p>  <p>🧑🏻‍🔬 ⬆️ 🧬 🧫 😊</p> | <p>CHEMBL117<br/>Similarity: 0.843</p>  <p>🧑🏻‍🔬 ⬆️ 🧬 🧫 😊</p> |
|------------------------------------------------------------------------------------------------------------------------------------------------|---------------------------------------------------------------------------------------------------------------------------------------------------|---------------------------------------------------------------------------------------------------------------------------------------------------|

(c)

Figure S3. Effects of 8-OHD on the expression of *RUNX1*, *MYC*, *NPM1* and *TERT* in THP-1 cells. RNA was prepared from THP-1 cells which were treated with 50  $\mu$ M 8-OHD for 24 h. The gene expression was measured by RT-qPCR as described in Materials and Methods.

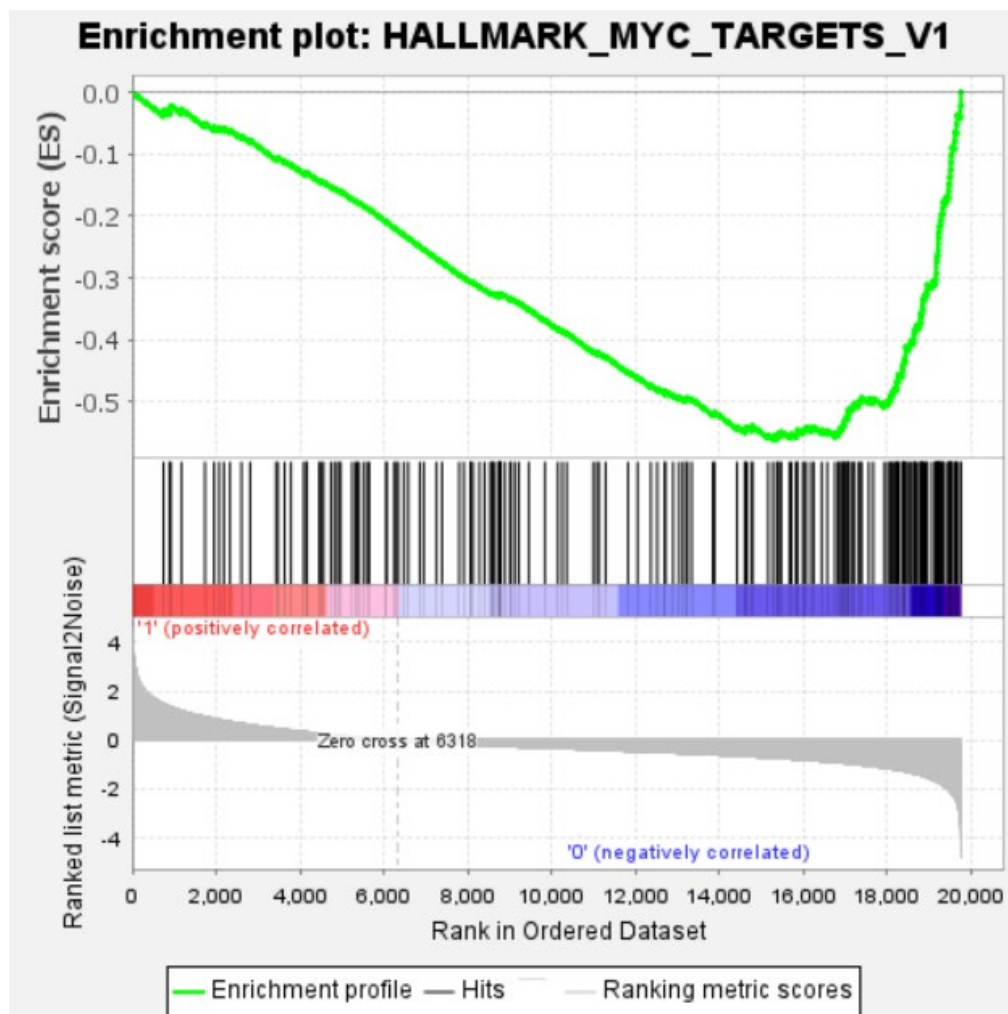

Figure S4. Known actives on TERT, FLT3 and CDK6 that are highly similar to 8-OHD according to 3D measures.
